# Supplementary material
Source: PubMed Central journal article supplement (PMC10991101)

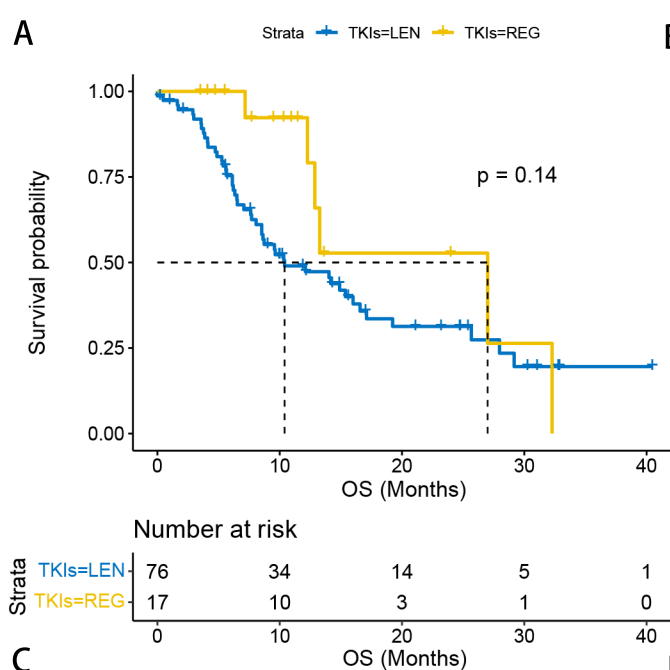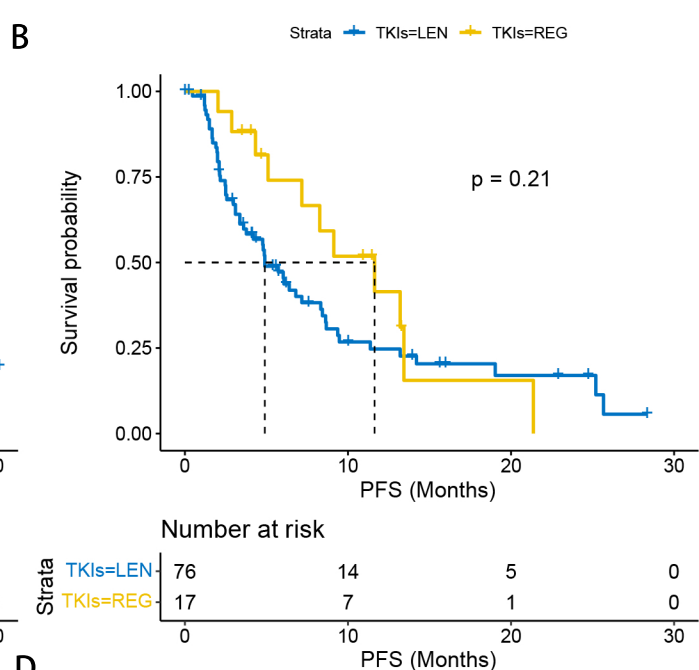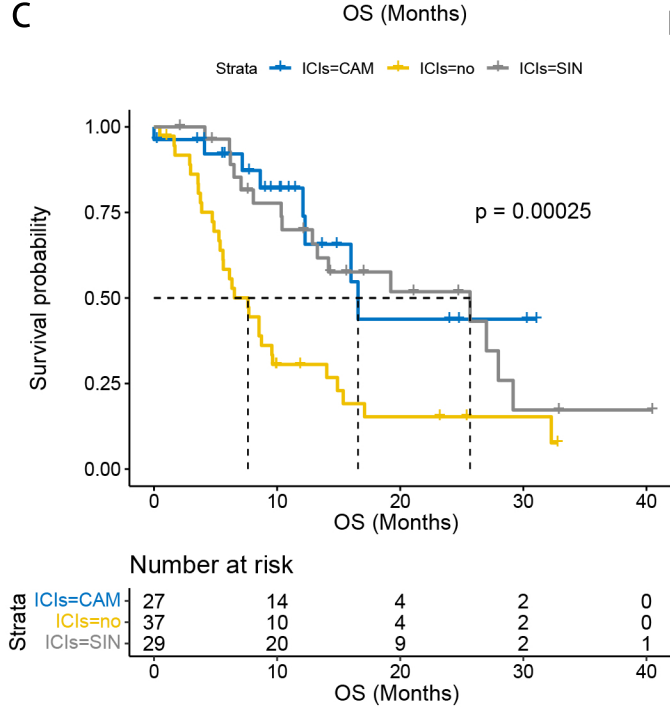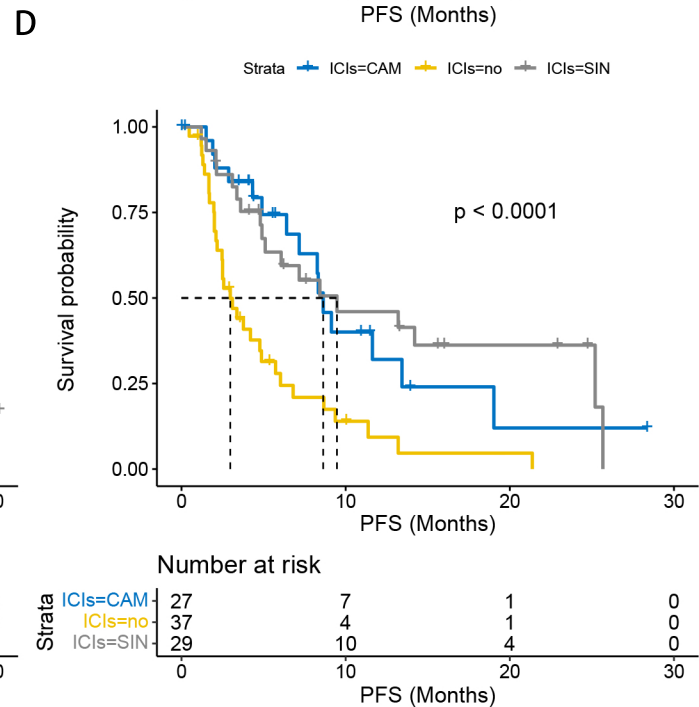

Supplement: 262_2022_3324_MOESM1_ESM.pdf [file 262_2022_3324_MOESM1_ESM.pdf]
